# Supplementary figures and images for: Infant Botulism: Checklist for Timely Clinical Diagnosis and New Possible Risk Factors Originated from a Case Report and Literature Review
Source: MDPI journal article supplement (doi:10.3390/toxins13120860), 2021-12-02

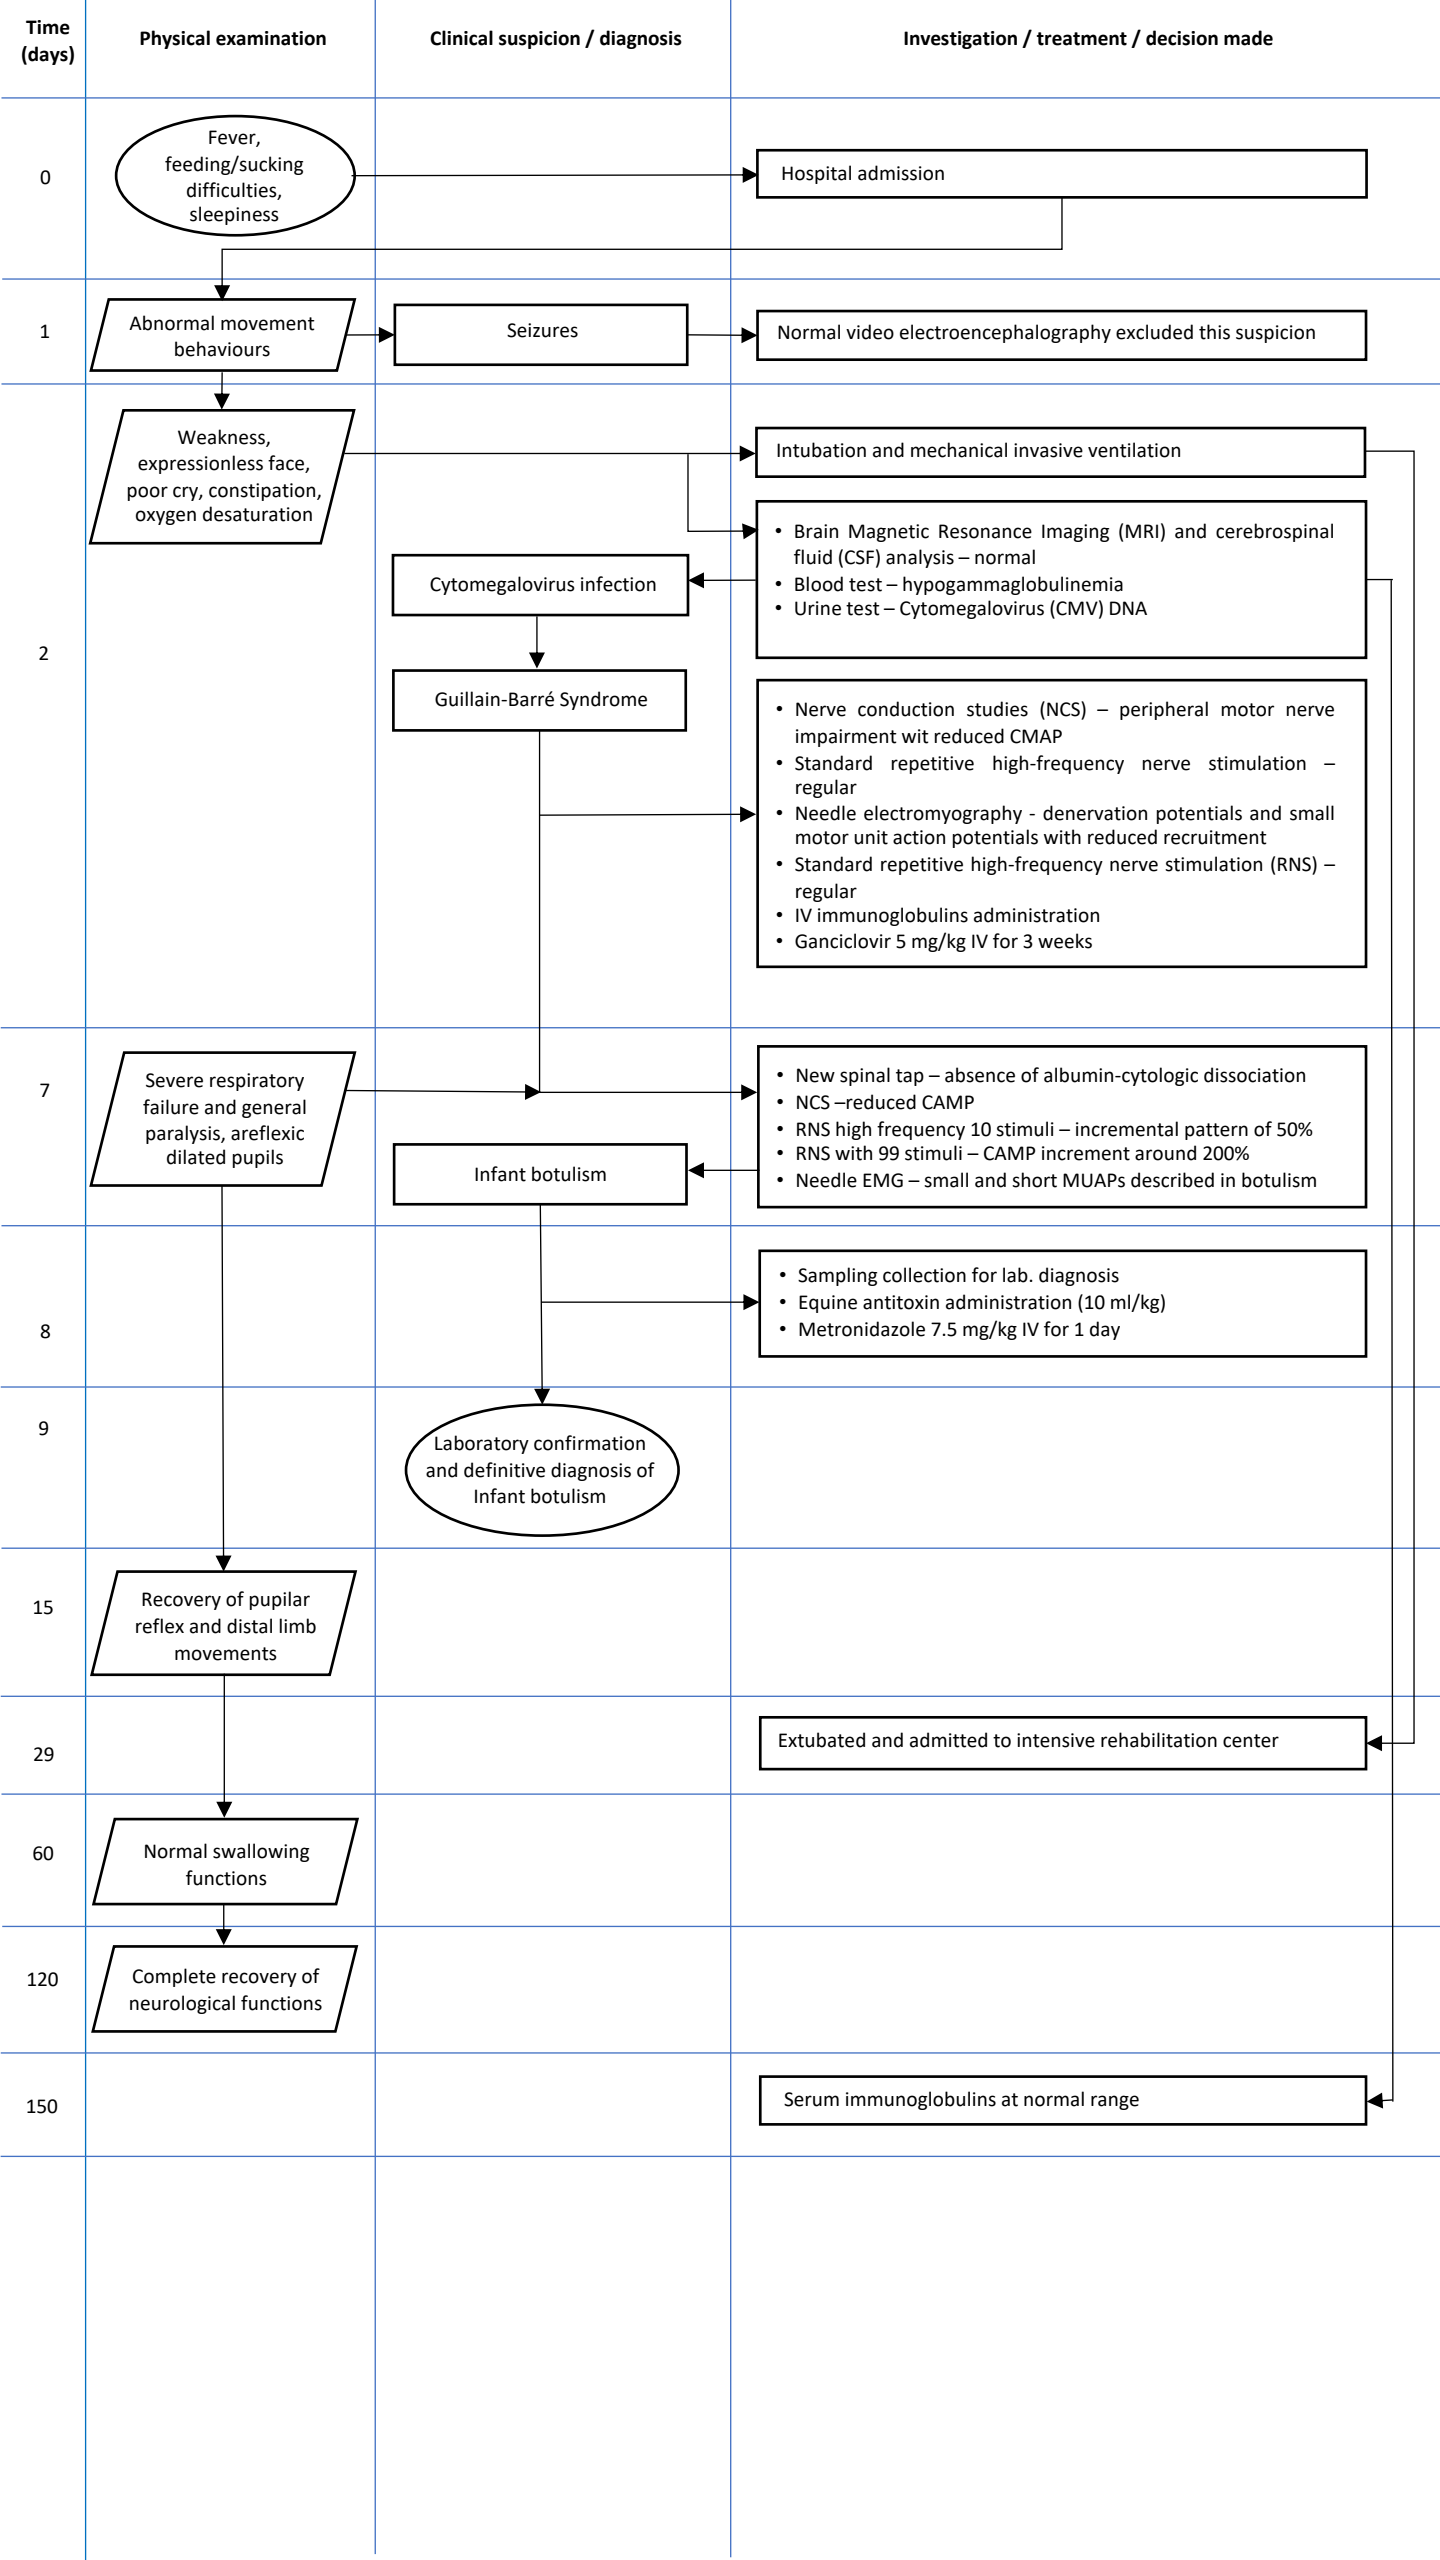

Supplement: s1 [file s1]
